# Supplementary material for: Live-imaging of endothelial Erk activity reveals dynamic and sequential signalling events during regenerative angiogenesis
Source: eLife. 2021 May 18;10:e62196. doi: 10.7554/eLife.62196 (PMC8175085; doi:10.7554/eLife.62196)
Supplement: Figure 1—figure supplement 1—source data 1. [file elife-62196-fig1-figsupp1-data1.xlsx]

## Sheet: Sheet1
Figure 1-figure supplement 1-source data1						Figure 1-figure supplement 1B				Figure 1 - figure supplement 1C					Figure 1 - figure supplement 1F					Figure 1-figure supplement 1G
							22 hpf				Nuclear EKC/H2B-mCherry intensity	Nucler EKC intensity				Migrating EC	Non-migrating EC				Elliptic	Oblate (less elliptical)
						EC 1	1.01688			embryo 1	0.704782	0.541667			EC 1	12.4224	2.71739			EC1	0.430605	1.35685
						EC 2	1.02683				0.462279	0.558522			EC 2	3.69004	1.67504			EC2	0.74063	0.650289
						EC 3	0.917486				0.419288	0.615854			EC 3	4.71698	3.33333			EC3	0.804671	1.65244
						EC 4	0.657715				0.593756	0.509709			EC 4	2.27273	2.20751			EC4	0.50495	1.17436
						EC 5	0.959122								EC 5	7.5188	3.15457			EC5	0.820896	1.65278
						EC 6	0.794139			embryo 2	0.483179	0.64			EC 6	2.91545	2.92398			EC6	1.03373	1.15316
						EC 7	0.682563				0.586039	0.577024			EC 7	3.83142	1.76056			EC7	0.697531	1.05342
						EC 8	0.650902				0.565975	0.58804			EC 8	5.64972	2.38663			EC8	0.541485	1.27005
						EC 9	0.675964				0.684779	0.658915			EC 9	4.38596	2.7027			EC9	1.0514	0.694798
						EC 10	0.67704								EC 10	4.23729	3.47222			EC10	0.667166	0.735661
						EC 11	0.669407			embryo 3	0.704208	0.852321			EC 11	6.21118	2.96736			EC11	0.862805	0.66108
						EC 12	0.677383				0.717867	0.753247			EC 12	2.38663	1.66667			EC12	0.522944	0.635404
						EC 13	0.560233				0.458033	0.461806			EC 13	7.0922	1.89036			EC13	0.512067	1.46624
						EC 14	0.71732				1.01471	0.927778			EC 14	5.37634	1.42045			EC14	1.47268	1.02212
						EC 15	0.744919				0.686178	0.645695			EC 15	7.57576	1.36799			EC15	0.8	1.25989
						EC 16	0.608779								EC 16	5	1.61031			EC16	0.643952	0.937817
						EC 17	0.73314			embryo 4	0.396457	0.347977			EC 17	4.01606	2.28311			EC17	0.742138	1.41353
						EC 18	0.743488				0.781663	0.936082			EC 18	3.93701	1.52905			EC18	0.768879	1.26714
						EC 19	0.726467				0.679834	0.610219			EC 19	5.20833	2.6455			EC19	0.632509	1.07663
						EC 20	0.728162				0.500361	0.453416			EC 20	4.01606	2.5641			EC20	0.981609	1.19813
						EC 21	0.640838								EC 21	9.34579	2.97619			EC21	0.792258	1.31948
						EC 22	0.874578			embryo 5	0.76035	0.608466			EC 22	7.29927	3.0303			EC22	0.767033	1.22173
						EC 23	0.927178				0.689289	0.683521			EC 23	7.5188	2.18818			EC23	0.926829	1.50424
						EC 24	0.846989								EC 24	7.5188	2.33645			EC24	0.629932	1.08932
						EC 25	1.21481			embryo 6	0.415054	0.606373			EC 25	4.80769	1.78253			EC25	1.39949	0.99654
						EC 26	1.02447				0.983408	1.08514			EC 26	8.62069	3.93701			EC26	0.795799	1.55198
						EC 27	0.942551				0.67349	0.760719			EC 27	1.8315	3.61011			EC27	0.65943	0.841393
						EC 28	0.751712				0.731005	0.714286			EC 28	1.67785	2.457			EC28	0.693241	1.17435
						EC 29	0.651335				0.539599	0.496183			EC 29	7.75194	3.21543			EC29	0.812849	1.23214
						EC 30	0.646631								EC 30	5.58971	2.09644			EC30	0.728962	1.38974
						EC 31	0.855313			embryo 7	1.42524	1.90157			EC 31	3.62319	2.12314			EC31	0.831435	0.887006
						EC 32	0.752078				1.26608	1.19421			EC 32	3.0581	2.12766			EC32	0.63707	1.05538
						EC 33	0.804192				0.375777	0.363784			EC 33	3.14465	1.8018			EC33	1.32447	1.43733
						EC 34	0.796031								EC 34	3.57143	1.46843			EC34	0.977364	1.3087
						EC 35	0.510948			embryo 8	1.47963	2.11905			EC 35	3.63636	2.36967			EC35	0.844262	1.48954
						EC 36	0.688171				0.66955	0.702614			EC 36	4.92611	1.87617			EC36	0.598131	0.888268
						EC 37	0.622292				1.0296	1.11523			EC 37	4.60829	2.0284			EC37	0.790194	0.494725
						EC 38	0.626637								EC 38	3.52113	2.14133			EC38	1.00903	0.953528
						EC 39	1.11588			embryo 9	0.913456	1.40722			EC 39	3.30033	2.35849			EC39	0.671979	1.18129
						EC 40	0.683114				0.733422	0.859838			EC 40	6.80272	3.98406			EC40	0.665816	1.11343
						EC 41	0.791515								EC 41	6.62252	2.35294			EC41	1.0386	1.61239
						EC 42	0.864787			embryo 10	0.695919	0.8125			EC 42	9.00901	7.0922			EC42	0.813679	1.32976
						EC 43	0.578193				0.669942	0.748908			EC 43	1.88679	1.90476			EC43	1.35104	1.14096
						EC 44	0.587205				0.563277	0.494465			EC 44	5.68182	2.40385			EC44	0.648829	1.08036
						EC 45	0.827485				1.14218	1.37615			EC 45	10.4493	1.8315			EC45	0.941748	0.703297
						EC 46	0.68564				0.643118	0.579677			EC 46	7.14286	2.77778			EC46	0.883929	1.25581
						EC 47	0.669627								EC 47	3.57143	2.40385			EC47	0.678636	1.03682
						EC 48	0.785166			embryo 11	0.914213	1.05588			EC 48	3.81679	2.33645
						EC 49	0.817935				0.58712	0.639144			EC 49	2.38663	1.97239
						EC 50	0.814075				0.77133	0.83758			EC 50	3.61011	2.68817
						EC 51	0.92144				0.389156	0.379722			EC 51	3.81679	2
						EC 52	1.02986				0.887616	0.913386			EC 52	8	3.7037
						EC 53	0.831828								EC 53	2.36407	1.8622
						EC 54	0.826042			embryo 12	0.544294	0.783784			EC 54	2.1097	2.48139
						EC 55	0.67052				1.01351	1.11066			EC 55	3.63636	2.34192
						EC 56	0.65602				0.698718	0.596154			EC 56	3.61011	3.11526
						EC 57	0.956026								EC 57	12.4844	2.77778
						EC 58	0.580537			embryo 13	0.890458	0.941423			EC 58	1.5949	2.47525
						EC 59	1.1314				0.730137	0.782609			EC 59	5.71429	1.84162
						EC 60	0.726518				0.611777	0.552381			EC 60	2.38663	2.68817
						EC 61	0.688784								EC 61	4.71698	3.01205
						EC 62	0.624338			embryo 14	0.698165	1.07944			EC 62	4.36681	2.29358
						EC 63	0.860086				1.23884	1.54194			EC 63	2.75482	3.03951
						EC 64	0.761003				0.83341	1.06965			EC 64	2.71739
						EC 65	0.924706								EC 65	3.09598
						EC 66	0.809558			embryo 15	0.647089	0.749658			EC 66	3.78788
						EC 67	0.760459				1.00501	0.961094			EC 67	1.89394
						EC 68	0.796229				2.07566	1.66456			EC 68	6.75676
						EC 69	0.727628								EC 69	2.73973
						EC 70	1.004			embryo 16	0.726605	1.03741			EC 70	4.65116
						EC 71	0.624304				0.863493	0.703911			EC 71	3.09598
						EC 72	1.17001								EC 72	6.57895
						EC 73	0.560474			embryo 17	0.911222	0.946269			EC 73	8.77193
						EC 74	0.940489				0.623605	0.613365			EC 74	5.68182
						EC 75	0.911007				0.850136	0.690998			EC 75	3.44828
						EC 76	0.973054				0.884864	0.876963			EC 76	5.12821
						EC 77	0.771885				0.556736	0.705618			EC 77	4.71698
						EC 78	1.46104								EC 78	3.30033
						EC 79	0.917148								EC 79	3.08642
						EC 80	0.969644			embryo 18	0.860122	0.821826			EC 80	2.08768
						EC 81	0.922201				0.737717	0.846626			EC 81	7.87402
						EC 82	0.95017				0.763417	0.736287			EC 82	4.7619
						EC 83	1.3673								EC 83	5.43478
						EC 84	1.38358			embryo 19	1.23818	1.31594			EC 84	8.13008
						EC 85	0.711214				0.922821	1.05385			EC 85	3.63636
						EC 86	0.943943				0.793862	0.967033			EC 86	2.90698
						EC 87	0.701645				1.06669	1.57672			EC 87	4.08163
						EC 88	0.761991								EC 88	6.21118
						EC 89	0.809075			embryo 20	0.664887	0.75			EC 89	5.29101
						EC 90	0.924221				0.962774	1.11594			EC 90	6.25
						EC 91	0.793799				1.01612	1.32946			EC 91	5.49451
						EC 92	0.727382								EC 92	4
						EC 93	0.753832			embryo 21	0.911094	0.86413			EC 93	8.19672
						EC 94	0.689293				0.23281	0.332162			EC 94	9.09091
						EC 95	0.842155								EC 95	10.4493
						EC 96	0.669415			embryo 22	1.01436	0.955017			EC 96	3.663
						EC 97	0.741367				0.788517	0.850679			EC 97	2.88184
						EC 98	0.843204								EC 98	5.2356
						EC 99	0.666216			embryo 23	0.8399	0.800752			EC 99	3.59712
						EC 100	0.790481				0.580752	0.875			EC 100	4.25532
						EC 101	0.868849				0.691799	0.661721			EC 101	4.01606
						EC 102	0.788322								EC 102	8.47458
						EC 103	0.769603			embryo 24	0.699935	0.711944			EC 103	4.73934
						EC 104	0.788153				0.546147	0.477108			EC 104	5
						EC 105	0.7553				0.616058	0.581673			EC 105	5
						EC 106	0.722748								EC 106	5.37634
						EC 107	0.897224			embryo 25	0.550609	0.482709			EC 107	6.45161
						EC 108	0.621258				0.871763	1.06652			EC 108	6.28931
						EC 109	0.609765				1.15266	1.30471			EC 109	4.09836
						EC 110	0.628117				0.862612	0.803797			EC 110	5.88235
						EC 111	0.771351								EC 111	3.62319
						EC 112	0.658882			embryo 26	0.730621	0.695021			EC 112	4.52489
						EC 113	0.791788								EC 113	3.34448
						EC 114	0.660853			embryo 27	0.74019	0.564286			EC 114	7.19424
						EC 115	0.729038				0.60753	0.767516			EC 115	5.31915
						EC 116	0.815453								EC 116	8.84956
						EC 117	0.647712			embryo 28	0.800951	0.782324			EC 117	4.46429
						EC 118	0.759297				0.975204	0.956522			EC 118	5.46448
						EC 119	0.656302								EC 119	14.4928
						EC 120	0.857513			embryo 29	0.799557	0.986166			EC 120	4.06504
						EC 121	0.809801				0.827055	0.699816			EC 121	11.0619
						EC 122	0.621052								EC 122	4.23729
						EC 123	0.78294			embryo 30	0.825605	0.70922			EC 123	7.04225
						EC 124	0.86591				0.768772	0.841398			EC 124	2.93255
						EC 125	0.804285				0.549892	0.486535			EC 125	5.81395
						EC 126	0.872352
						EC 127	0.581224			embryo 31	0.466901	0.409692
						EC 128	0.749404
						EC 129	0.830202			embryo 32	0.522582	0.484919
						EC 130	0.883861				1.16497	0.932584
						EC 131	0.996497				0.817251	0.75
						EC 132	0.779347
						EC 133	1.52411			embryo 33	0.687591	0.570388
										embryo 34	0.81992	0.713846
											0.783366	0.677419
											0.56564	0.581522
										embryo 35	0.952559	0.777778
											0.737992	0.66482
										embryo 36	0.486873	0.455072
										embryo 37	0.864958	0.855072
											1.36307	1.15302
											0.720346	0.704188
