# Supplementary material for: Live-imaging of endothelial Erk activity reveals dynamic and sequential signalling events during regenerative angiogenesis
Source: eLife. 2021 May 18;10:e62196. doi: 10.7554/eLife.62196 (PMC8175085; doi:10.7554/eLife.62196)
Supplement: Figure 1—source data 1. [file elife-62196-fig1-data1.xlsx]

## Sheet: Sheet1
Figure 1-source data 1			Figure 1I
				DMSO	SL327	SU5416
			EC 1	0.601397	1.28	1.36562
			EC 2	0.865592	1.05595	1.04808
			EC 3	0.648227	1.30477	1.46572
			EC 4	0.691639	1.62463	1.7016
			EC 5	0.701016	1.48344	1.75312
			EC 6	0.9025	0.957265	1.0582
			EC 7	0.745723	0.923355	1.65835
			EC 8	0.783143	1.07079	1.88408
			EC 9	0.84842	1.6373	1.5594
			EC 10	0.745509	0.981356	2.05618
			EC 11	0.736089	1.38338	2.82313
			EC 12	0.950918	1.42078	1.92522
			EC 13	0.808659	0.853974	0.991104
			EC 14	0.600526	0.91342	1.21968
			EC 15	0.856992	1.36645	1.95128
			EC 16	0.714051	1.24047	1.06192
			EC 17	0.704331	1.48279	0.99043
			EC 18	0.687302	1.23824	2.04411
			EC 19	0.653983	1.05851	2.88084
			EC 20	0.818464	1.44629	1.51269
			EC 21	0.714415	1.57568	1.61404
			EC 22	0.752713	1.00025	1.55027
			EC 23	0.782155	1.04196	2.28305
			EC 24	0.986298	1.13742	2.52176
			EC 25	0.818997	1.31036	1.70335
			EC 26	1.02698	1.05728	1.47829
			EC 27	0.766802	1.34764	2.93056
			EC 28	0.73976	1.77105	1.14039
			EC 29	0.971361	1.62042	2.6289
			EC 30	1.36449	1.25427	2.43006
			EC 31	1.24583	1.17481	2.09216
			EC 32	0.747266	0.996115	2.14647
			EC 33	0.685856	0.867457	1.77367
			EC 34	0.742084	1.26527	1.60705
			EC 35	0.835803	1.28714	2.164
			EC 36	0.665162	1.36382	1.23269
			EC 37	0.727957	1.68424	1.54556
			EC 38	0.578197	2.30556	1.26708
			EC 39	0.556348	1.92132	1.77933
			EC 40	0.728262	0.834525	0.773089
			EC 41	0.804468	2.18364	1.53407
			EC 42	0.765229	1.9582	1.22037
			EC 43	0.748909	1.72834	2.13971
			EC 44	0.793053	1.28665	1.0819
			EC 45	0.554666	1.38449	1.35465
			EC 46	0.619324	1.79883	1.48393
			EC 47	1.35633	1.12177	3.07509
			EC 48	0.959377	1.14839	1.83478
			EC 49	0.844449	1.13641	1.74421
			EC 50	0.849201	1.43549	1.1396
			EC 51	0.560226	1.06649	1.20206
			EC 52	0.894082	1.49692	1.39742
			EC 53	1.08161	1.22526	1.18459
			EC 54	1.50193	0.921618	1.29338
			EC 55	0.953339	1.3252	1.33394
			EC 56	0.936232	1.71012	1.3938
			EC 57	0.928779	1.89295	1.70222
			EC 58	1.56065	1.68171	1.2692
			EC 59	1.08975	1.44958	1.09994
			EC 60	0.956703	1.2884	1.28229
			EC 61	1.02988	2.00209	1.33469
			EC 62	0.758597	1.0647	2.21681
			EC 63	1.00653	1.15472	2.81643
			EC 64	1.35953	1.27185	1.34251
			EC 65	0.833225	1.8447	1.21642
			EC 66	1.00039	1.01479	1.65589
			EC 67	1.09766	1.01399	1.28455
			EC 68	1.35161	1.19123	1.4457
			EC 69	1.14446	2.18352	1.38811
			EC 70	1.06971	1.02167	1.11114
			EC 71	0.8125	0.930797	1.67999
			EC 72	0.64346	1.24026	1.80557
			EC 73	1.02124	1.69608	2.33349
			EC 74	0.891531	1.28158	1.90128
			EC 75	0.805607	1.76855	2.1308
			EC 76	0.681071	1.37238	1.46332
			EC 77	1.01009	1.95792	2.5264
			EC 78	0.72236	2.45976	1.51508
			EC 79	0.792208	1.68728	2.03148
			EC 80	0.767164	1.38137	1.11406
			EC 81	0.844459	1.71459	3.29235
			EC 82	0.871266	1.72729	1.90673
			EC 83	0.859065	1.84826	2.20484
			EC 84	0.928991	1.60047	1.37931
			EC 85	1.26545	1.22016	1.19386
			EC 86	1.25508	2.02076	1.1256
			EC 87	1.05469	1.19062	2.4013
			EC 88	1.08163	0.770977	1.09593
			EC 89	1.17293	1.00864	1.5307
			EC 90	0.694694	1.15209	1.44668
			EC 91	1.14303	1.86846	1.09805
			EC 92	0.819136	1.58294	1.12321
			EC 93	0.955397	2.21803	1.07444
			EC 94		2.36771	1.21004
			EC 95		1.36206	1.24917
			EC 96		1.33025	1.09327
			EC 97		1.76144	1.09778
			EC 98		1.0394	1.50791
			EC 99		1.00965	1.39127
			EC 100		1.28958	1.30971
			EC 101		1.29012	1.377
			EC 102		1.72082	1.34653
			EC 103		1.23204	1.30772
			EC 104		1.56945	1.46197
			EC 105		1.40425	1.45881
			EC 106		1.6334	1.50463
			EC 107		1.42765	1.24205
			EC 108		1.36651	1.44522
			EC 109		1.61767	1.67116
			EC 110		1.71082	1.49587
			EC 111		2.06054	1.3399
			EC 112		1.31949	1.37774
			EC 113		1.00843	1.05276
			EC 114		2.01091	1.16433
			EC 115			1.14418
			EC 116			1.47047
			EC 117			1.1828
			EC 118			1.25362
