# Supplementary material for: Live-imaging of endothelial Erk activity reveals dynamic and sequential signalling events during regenerative angiogenesis
Source: eLife. 2021 May 18;10:e62196. doi: 10.7554/eLife.62196 (PMC8175085; doi:10.7554/eLife.62196)
Supplement: Figure 2—source data 1. [file elife-62196-fig2-data1.xlsx]

## Sheet: Sheet1
Figure 2-source data 1			Figure 2J/K
				Minutes post-cytokinesis	Embryo 1	Embryo 2	Embryo 3	Embryo 4	Embryo 5	Embryo 6	Embryo 7	Embryo 8	Embryo 9	Embryo 10	Embryo 11	Embryo 12	Embryo 13	Embryo 14
				0	1	1	1	1	1	1	1	1	1	1	1	1	1	1
				1	0.988732	1.00332	1.00447	0.971443	0.975186	1.02148	0.949728	0.969967	0.995469	1.01693	1.00884	0.967963	0.994564	1.0361
				2	1.00059	1.02389	0.985921	0.960353	0.956081	1.03937	0.885486	0.980819	0.993062	0.999188	1.01217	0.946065	0.966863	0.998139
				3	0.97815	1.05681	0.986338	0.977267	0.939146	1.00608	0.831926	0.974738	0.996884	0.994344	1.02766	0.958541	0.924838	0.971052
				4	0.951085	1.01382	0.978348	0.970411	0.908952	0.978687	0.785091	0.977123	1.01027	0.997049	1.00725	0.965875	0.904158	0.953172
				5	0.944271	0.976832	0.964686	0.931818	0.916938	0.955332	0.760723	0.950982	1.00179	0.979309	0.997368	0.976753	0.897194	0.931378
				6	0.948021	0.934363	0.949496	0.925332	0.923043	0.923851	0.73244	0.891666	0.996286	0.97171	0.976639	0.969578	0.889827	0.921648
				7	0.952871	0.91699	0.949759	0.913105	0.920749	0.927084	0.705055	0.878791	0.991704	0.976067	0.951271	0.921538	0.887229	0.933204
				8	0.938963	0.904386	0.935376	0.899068	0.931522	0.894325	0.608278	0.85277	0.977221	0.943041	0.940983	0.843847	0.897472	0.961859
				9	0.898272	0.892658	0.957154	0.903285	0.908357	0.879887	0.627468	0.857649	0.944019	0.908766	0.973028	0.797718	0.882396	0.972652
				10	0.876426	0.873366	0.879714	0.902222	0.893592	0.858394	0.594369	0.842748	0.923948	0.876856	0.941457	0.749662	0.820722	1.00034
				11	0.870297	0.88169	0.906188	0.880378	0.868103	0.83787	0.563397	0.829688	0.915647	0.842252	0.931418	0.727705	0.802295	1.01716
				12	0.877034	0.884763	0.748179	0.831971	0.848507	0.790626	0.536431	0.805996	0.900839	0.795214	0.920967	0.709506	0.778646	0.983635
				13	0.844266	0.873941	0.7218	0.790722	0.833085	0.737783	0.504746	0.796668	0.869949	0.744744	0.903108	0.726747	0.72704	0.979361
				14	0.818315	0.85976	0.693624	0.743899	0.816937	0.75068	0.502124	0.779053	0.844869	0.691336	0.84273	0.742541	0.695444	0.962492
				15	0.792203	0.817577	0.662793	0.724766	0.797558	0.684249	0.481557	0.746969	0.813523	0.663154	0.794629	0.776381	0.682505	0.941382
				16	0.778352	0.771971	0.674879	0.737004	0.776092	0.657991	0.470451	0.734593	0.772084	0.645706	0.726845	0.813345	0.666227	0.920745
				17	0.781952	0.742559	0.634743	0.724304	0.771647	0.64883	0.465632	0.716331	0.739547	0.652387	0.668735	0.844028	0.646859	0.903955
				18	0.793612	0.693429	0.564752	0.715553	0.770156	0.642875	0.450763	0.705703	0.729557	0.645842	0.617418	0.862274	0.645163	0.888284
				19	0.835668	0.667971	0.523218	0.743546	0.754007	0.631842	0.450021	0.679324	0.702421	0.659023	0.585525	0.852376	0.610872	0.854111
				20	0.874603	0.675381	0.52639	0.733917	0.713456	0.636366	0.44608	0.681809	0.67042	0.651112	0.584613	0.878604	0.609853	0.829843
				21	0.898633	0.671147	0.546068	0.714184	0.67001	0.640772	0.443419	0.660903	0.63223	0.654294	0.586396	0.889492	0.625485	0.811561
				22	0.904161	0.668757			0.617724	0.657667	0.447152	0.659618	0.605262	0.676316	0.582903	0.885444	0.63059	0.805792
				23	0.950521	0.662759			0.605355	0.687309	0.45385	0.649789		0.69455	0.589509	0.871056	0.64364	0.803855
				24	0.95914	0.646598			0.587342	0.71184	0.454294	0.652472		0.697569	0.584702	0.898505	0.659632	0.807006
				25	0.954259	0.653458			0.590425	0.732921	0.465781	0.658617		0.702336	0.609536	0.904218	0.662831	0.800264
				26	0.926154				0.603262	0.739168	0.46733	0.682835		0.707099	0.621892	0.873237	0.66828	0.799344
				27	0.900194				0.588563	0.752285	0.488408	0.693823		0.72273	0.641335	0.873781	0.67825	0.799679
				28					0.606527	0.778931	0.487567	0.693218		0.721193		0.867296	0.69217	0.808781
				29							0.498107	0.705075		0.722664		0.863885	0.71524	0.810521
				30							0.526141	0.720897		0.729991		0.869506	0.718183	0.813375
				31							0.551063	0.73407		0.754162		0.870329		0.819555
				32							0.568643	0.735913		0.771723		0.872242
				33							0.603258			0.771954		0.900736
				34							0.609198					0.912142
