# Supplementary material for: Live-imaging of endothelial Erk activity reveals dynamic and sequential signalling events during regenerative angiogenesis
Source: eLife. 2021 May 18;10:e62196. doi: 10.7554/eLife.62196 (PMC8175085; doi:10.7554/eLife.62196)
Supplement: Figure 3—figure supplement 1—source data 1. [file elife-62196-fig3-figsupp1-data1.xlsx]

## Sheet: Sheet1
Figure 3-figure supplement 1-source data 1					Figure 3-figure supplement 1C
						Control	Adjacent ISV	2nd adjacent ISV	3rd adjacent ISV
					Larva 1	0.807	0.599	1.16	0.955
						0.897	0.537	1.07	1.17
						0.725	0.569	1.05	0.998
					Larva 2	1.35	0.617	0.715	0.825
						0.973	0.717	0.573	0.767
						1.03	0.792	0.952	0.941
					Larva 3	0.934	0.502	0.867	1.11
						0.808	0.555	0.756	0.968
						0.96	0.55	0.744	1
					Larva 4	1.23	0.483	0.63	0.697
						0.863	0.489	0.685	0.708
						0.886	0.631	0.907	0.938
					Larva 5	1.03	0.672	1.14	1.15
						1.27	0.703	0.951	1.16
						1.22	0.773	1.34	1.3
					Larva 6	0.833	0.772	1.08	0.986
						0.871	1.19	1.16	1.17
						0.926	1.11	0.903	0.892
					Larva 7	1.05	0.606	1.01	0.952
						1.34	0.78	0.986	0.882
						0.831	0.895	0.971	0.729
					Larva 8	1.03	0.699	0.915	1
						1.28	0.55	0.581	1.35
						1.33	0.603	0.905	1.34
					Larva 9	1.04	0.593	0.951	0.856
						1.03	0.708	0.921	0.912
						1.08	0.75	0.939	0.937
					Larva 10	0.892
						0.726
						0.741
