# Supplementary material for: Live-imaging of endothelial Erk activity reveals dynamic and sequential signalling events during regenerative angiogenesis
Source: eLife. 2021 May 18;10:e62196. doi: 10.7554/eLife.62196 (PMC8175085; doi:10.7554/eLife.62196)
Supplement: Figure 3—figure supplement 3—source data 1. [file elife-62196-fig3-figsupp3-data1.xlsx]

## Sheet: Sheet1
Figure 3-figure supplement 3-source data 1					Figure 3-figure supplement 3C
						DMSO	AV951
					EC1	1.03986	1.51182
					EC2	0.69566	1.2506
					EC3	0.816522	2.30356
					EC4	0.827727	1.71967
					EC5	0.781988	1.0871
					EC6	1.10884	1.47701
					EC7	0.693762	1.2611
					EC8	0.699645	1.31618
					EC9	0.999696	1.12503
					EC10	0.772368	1.61376
					EC11	0.72607	1.41124
					EC12	0.974164	1.09755
					EC13	0.636971	1.13669
					EC14	0.778258	1.54842
					EC15	0.826264	1.87684
					EC16	0.902554	1.83624
					EC17	0.691848	1.58682
					EC18	0.815995	0.962743
					EC19	0.858108	1.15924
					EC20	0.781061	1.20653
					EC21	0.734794	1.59726
					EC22	0.781674	1.49941
					EC23	0.801654	1.72043
					EC24	0.697128	1.47316
					EC25	0.887304	1.16873
					EC26	0.65507	1.35795
					EC27	0.953446	1.54488
					EC28	0.947352	1.43425
					EC29	0.860522	1.72694
					EC30	1.08822	1.32594
					EC31	0.777194	1.51535
					EC32	0.641805	1.12463
					EC33	1.26639	2.26791
					EC34	0.763198	1.0812
					EC35	0.933823	1.25562
					EC36	0.881381	1.45291
					EC37	0.896472	1.09456
					EC38	0.573684	1.54596
					EC39	0.581144	1.13621
					EC40	0.718439	1.67369
					EC41	0.971507	0.850325
					EC42	0.841821	1.09138
					EC43	0.678186	1.38809
					EC44	0.815133	1.08721
					EC45	1.41788	1.01218
					EC46	0.858665	1.99989
					EC47	0.802109	1.6393
					EC48	1.05703	1.37866
					EC49	1.1461	1.92729
					EC50	1.18347	0.973182
					EC51	1.11595	1.97664
					EC52	0.767926	1.47471
					EC53	0.540559	1.1118
					EC54	1.00969
					EC55	0.519946
					EC56	0.621197
					EC57	0.567514
					EC58	0.749868
					EC59	0.781218
					EC60	0.785548
					EC61	0.913402
					EC62	0.778894
					EC63	0.828913
					EC64	1.59012
					EC65	0.946167
