# Supplementary material for: Live-imaging of endothelial Erk activity reveals dynamic and sequential signalling events during regenerative angiogenesis
Source: eLife. 2021 May 18;10:e62196. doi: 10.7554/eLife.62196 (PMC8175085; doi:10.7554/eLife.62196)
Supplement: Figure 3—source data 1. [file elife-62196-fig3-data1.xlsx]

## Sheet: Sheet1
Figure 3-source data 1			Figure 3H and I		Ablated ISV
					Larva 1						Larva 2						Larva 3						Larva 4						Larva 5						Larva 6						Larva 7						Larva 8
				Time pre-ablation (min)	1st EC from wound		2nd EC from wound		3rd EC from wound		1st EC from wound		2nd EC from wound		3rd EC from wound		1st EC from wound		2nd EC from wound		3rd EC from wound		1st EC from wound		2nd EC from wound		3rd EC from wound		1st EC from wound		2nd EC from wound		3rd EC from wound		1st EC from wound		2nd EC from wound		3rd EC from wound		1st EC from wound		2nd EC from wound		3rd EC from wound		1st EC from wound		2nd EC from wound
				0	1		1		1		1		1		1		1		1		1		1		1		1		1		1		1		1		1		1		1		1		1		1		1
				1	0.980352		1.01168		1.01681		0.968452		1.02281		0.993258		1.03359		1.03931		1.01429		0.998808		0.992423		0.991879		1.01478		1.00948		1.01009		0.996317		1.05809		1.01433		1.03057		1.00123		0.975042		1.01027		0.985843
				2	0.955367		0.991782		1.01333		0.976089		1.03544		0.999398		1.01658		0.990809		1.01429		0.999046		1.01512		1.00035		1.0068		1.00217		0.988954		1.00354		1.07132		1.01139		1.0408		1.00759		0.965047		0.985596		1.02841
				3	0.97526		0.982045		1.00733		1.03138		1.06019		1.01247		0.989709		0.983804		1.01825		0.999671		1.01841		0.995237		1.00511		0.993407		1.02226		1.03954		1.07268		1.02274		1.03401		1.02457		0.972212		0.929228		0.98288
				4	0.950252		1.00944		1.01173		0.981128		1.0627		1.01409		0.978888		0.991853		1.01587		0.9936		1.02897		1.00216		1.00654		1.01142		1.00458		1.06421		1.08006		1.03535		1.03766		1.00219		0.965169		0.947639		0.995745
				5	0.94716		0.998428		1.01751		0.967434		1.05432		1.01154		0.962245		0.994243		1.00794		0.969991		1.02308		0.997755		0.999309		0.999576		1.01449		1.08898		1.09017		1.01752		1.01876		1.0092		0.974372		0.922776		0.939938
				6	0.926729		1.00224		1.00081		0.953579		1.05339		0.989426		0.910903		0.891644		0.964286		0.950255		1.02807		1.02011		0.980005		1.01074		1.01234		1.06458		1.07846		0.985412		1.02086		1.01128		0.993748		0.825939		0.91378
				7	0.939357		1.06496		0.990785		0.969736		1.05658		1.01416		0.861183		0.955843		1.01508		0.929052		1.03784		1.02773		0.936328		0.983932		0.94826		1.11403		1.09844		0.995822		0.982225		1.01965		0.992981		0.886056		0.926565
				8	0.893635		1.02901		0.981196		0.933828		1.04372		0.989768		0.823486		0.942156		0.984921		0.891947		1.04287		1.02172		0.961419		0.996294		1.00973		1.11931		1.08873		0.958222		0.978041		1.02708		1.00816		0.761287		0.802381
				9	0.909175		1.07318		0.999997		0.939108		1.03531		0.942266		0.811437		0.964852		0.976984		0.873542		1.0073		0.97845		0.951117		0.987731		0.998611		1.16128		1.09313		0.930564		0.936601		0.988915		0.991294		0.912919		0.953419
				10	0.898038		1.04923		0.976016		0.943628		1.05522		1.00038		0.790003		0.932918		0.975397		0.917061		1.05399		0.9954		0.931911		0.965582		0.973094		1.13688		1.0713		0.893282		0.976088		1.03174		1.02164		0.91716		0.948263
				11	0.901051		1.05709		0.983652		0.920443		1.04867		0.993417		0.734779		0.878338		0.97619		0.929125		1.03628		0.995925		0.90234		0.945487		0.985952		1.13918		1.04003		0.884961		0.964789		1.02705		1.04064		0.888816		0.924485
				12	0.86806		1.02918		0.993673		0.914244		1.05864		1.00542		0.743029		0.916207		0.973016		0.920155		1.00802		0.988933		0.903831		0.92784		0.972509		1.15688		1.09563		0.85738		0.971592		1.02258		1.03935		0.947283		0.981762
				13	0.864832		1.05771		1.02046		0.890413		1.01277		0.977064		0.75795		0.797298		0.963492		0.956549		0.996203		1.02556		0.889507		0.922174		0.971261		1.17324		1.09867		0.859146		0.969221		1.02289		1.06875		0.937621		0.972699
				14	0.834974		1.04146		0.989351		0.871496		0.990923		0.958152		0.749106		0.929267		0.957143		0.952608		0.932763		1.01632		0.870613		0.93455		0.972086		1.15094		1.10798		0.859891		0.943462		1.01396		1.07164		0.920031		1.00016
				15	0.776558		1.00888		0.956559		0.844122		1.02976		1.00119		0.724262		0.938956		0.95		0.956112		0.875122		0.992229		0.897843		0.949821		0.98863		1.16476		1.09127		0.859784		0.968601		1.01145		1.06057		0.936679		0.991602
				16	0.813661		1.07796		1.00666		0.848708		0.981147		0.975239		0.735631		0.941564		0.945238		0.945249		0.812762		0.992596		0.912571		0.943519		1.00883		1.178		1.09152		0.86637		0.900691		0.984059		1.03279		0.923676		0.962648
				17	0.779791		1.09271		1.0237		0.865759		0.986998		1.0275		0.738562		0.952871		0.938889		0.901334		0.758482		0.960494		0.898838		0.960358		1.00459		1.17135		1.08177		0.842041		0.913377		1.00117		1.04156		0.976177		1.01073
				18	0.736406		1.0585		1.02726		0.868684		0.980686		1.03863		0.704085		0.937601		0.95		0.876159		0.760936		0.954195		0.86861		0.933676		0.948998		1.16658		1.07954		0.824136		0.919826		1.02301		1.07144		0.968488		1.03115
				19	0.734062		1.06359		1.0288		0.850658		0.966349		1.03437		0.721397		0.929332		0.952381		0.875816		0.776627		0.963946		0.90946		0.973924		0.997769		1.17031		1.07602		0.784934		0.945108		1.00782		1.04972		1.02204		1.11528
				20	0.705313		1.03334		0.987867		0.835426		0.940274		1.00935		0.702051		0.920884		0.934127		0.845318		0.765484		0.950115		0.903009		0.968984		0.97426		1.20702		1.09175		0.782336		0.943501		1.02266		1.06314		1.04129		1.16158
				21	0.705313		1.03334		0.987867		0.835426		0.940274		1.00935		0.702051		0.920884		0.934127		0.845318		0.765484		0.950115		0.903009		0.968984		0.97426		1.20702		1.09175		0.782336		0.943501		1.02266		1.06314		1.04129		1.16158
				Time post-ablation (min)
				0	1.12521		0.972885		0.912586		1.09156		1.055		1.0322		1.43089		1.13064		1.21878		0.702703		0.868534		0.731609		1.00136		1.00827		1.00944		0.924578		0.864088		1.01087		0.887575		0.970232		1.06506		1.03393		1.06805
				1	1.12521		0.972885		0.912586		1.09156		1.055		1.0322		1.43089		1.13064		1.21878		0.702703		0.868534		0.731609		1.00136		1.00827		1.00944		0.924578		0.864088		1.01087		0.887575		0.970232		1.06506		1.03393		1.06805
				2	1.03562		0.893695		0.855246		1.00511		1.05398		1.04026		1.39172		1.01513		1.20847		0.676757		0.848897		0.670375		0.947711		0.990738		0.993566		0.889708		0.864494		1.02709		0.848988		0.97334		1.04577		1.0144		1.07782
				3	1.00686		0.821954		0.857686		0.912433		1.04023		1.0397		1.39315		1.01147		1.17048		0.661643		0.806318		0.648296		0.907262		0.962576		1.01119		0.793809		0.770248		1.00153		0.785924		0.939908		1.00211		0.911453		1.01114
				4	0.908432		0.723228		0.843277		0.827577		1.01165		1.04553		1.33899		0.945219		1.12079		0.63316		0.755997		0.589751		0.827286		0.84145		0.950857		0.684402		0.666052		0.995058		0.724331		0.918518		1.01167		0.66147		0.769234
				5	0.810359		0.631402		0.737521		0.769049		0.982628		1.02779		1.26777		0.853654		1.04989		0.631461		0.737237		0.578547		0.866176		0.845308		1.02878		0.617868		0.636896		0.945759		0.647623		0.835029		0.942084		0.698547		0.817377
				6	0.74604		0.577382		0.661668		0.759346		0.922761		1.02235		1.25924		0.821828		1.02834		0.626563		0.745281		0.604097		0.864919		0.812765		1.02343		0.565053		0.572469		0.876336		0.605078		0.742346		0.864099		0.651601		0.697318
				7	0.70173		0.544181		0.601712		0.761909		0.857871		0.990905		1.15194		0.828414		0.973305		0.65289		0.73703		0.60524		0.842169		0.792286		1.0091		0.559873		0.533717		0.806221		0.574423		0.699713		0.766836		0.615791		0.656133
				8	0.674815		0.520212		0.605827		0.738496		0.823071		1.01133		1.08		0.713755		0.941286		0.65098		0.756181		0.595538		0.836681		0.782482		1.01068		0.516823		0.530621		0.762977		0.53953		0.684104		0.800494		0.569559		0.605418
				9	0.644672		0.499303		0.57757		0.736446		0.791223		0.997036		0.999222		0.700144		0.911378		0.647326		0.762668		0.602999		0.82248		0.78754		0.989238		0.522304		0.530257		0.732197		0.559911		0.666791		0.666627		0.526998		0.556084
				10	0.651332		0.503297		0.54501		0.720671		0.735306		0.968478		1.03084		0.691139		0.959008		0.637736		0.782041		0.586928		0.832185		0.780547		0.943475		0.517223		0.510347		0.719139		0.537965		0.652926		0.713379		0.548109		0.583408
				11	0.630612		0.495638		0.582151		0.704464		0.727028		0.942552		1.05842		0.720981		1.00059		0.623686		0.742615		0.576091		0.799667		0.751482		0.856433		0.515649		0.511544		0.731139		0.537759		0.629657		0.681412		0.551061		0.585709
				12	0.633433		0.479386		0.537333		0.691406		0.718516		0.926885		1.03784		0.745478		0.976591		0.617167		0.72481		0.57328		0.803482		0.776833		0.818703		0.497378		0.527464		0.718349		0.526147		0.62064		0.735777		0.522972		0.559001
				13	0.623447		0.47315		0.485647		0.685167		0.720628		0.911162		1.00489		0.704369		0.956376		0.611918		0.73678		0.56541		0.807382		0.779902		0.783105		0.500071		0.522771		0.701541		0.511697		0.648075		0.7047		0.530699		0.573763
				14	0.644433		0.484449		0.531524		0.69433		0.728447		0.901753		0.97069		0.765047		0.904153		0.616639		0.756542		0.549253		0.807924		0.792018		0.754549		0.494452		0.536445		0.710133		0.494467		0.617793		0.642181		0.524736		0.564389
				15	0.630412		0.485386		0.511169		0.70292		0.723606		0.88023		0.966213		0.658965		0.916394		0.628036		0.823666		0.538842		0.808866		0.788849		0.737428		0.494339		0.526062		0.714143		0.501848		0.634729		0.695931		0.504604		0.553518
				16	0.637057		0.480511		0.491405		0.684779		0.701622		0.814532		0.90631		0.624529		0.876075		0.629432		0.863855		0.537089		0.80908		0.79342		0.736047		0.4961		0.522643		0.706418		0.491946		0.62905		0.616984		0.494973		0.539048
				17	0.63126		0.470195		0.512949		0.682014		0.69871		0.794008		0.892099		0.618845		0.86811		0.635636		0.974052		0.566503		0.820912		0.812505		0.734959		0.484909		0.5281		0.684719		0.477535		0.675432		0.650917		0.511122		0.572337
				18	0.586575		0.461878		0.475724		0.690121		0.703247		0.81969		0.952013		0.661555		0.957665		0.636555		1.05328		0.559826		0.829531		0.808639		0.735431		0.471438		0.508444		0.68868		0.491611		0.630233		0.616548		0.430634		0.489259
				19	0.628829		0.476343		0.514695		0.645676		0.677761		0.773332		0.92679		0.661162		0.925002		0.641541		1.06225		0.593489		0.818187		0.805031		0.735871		0.471979		0.536936		0.675394		0.479608		0.642896		0.646986		0.498865		0.563478
				20	0.63453		0.465032		0.514186		0.632627		0.667598		0.766211		0.928972		0.677567		0.930737		0.636477		1.07827		0.606735		0.814437		0.800854		0.744348		0.487132		0.530673		0.690165		0.508285		0.644514		0.606178		0.500858		0.560525
				21	0.66508		0.465159		0.522824		0.665581		0.695318		0.789146		0.958301		0.715056		0.968914		0.667596		1.12547		0.650967		0.822167		0.798139		0.736614		0.498733		0.535824		0.706239		0.501262		0.666271		0.668247		0.4437		0.505332
