# Supplementary material for: Live-imaging of endothelial Erk activity reveals dynamic and sequential signalling events during regenerative angiogenesis
Source: eLife. 2021 May 18;10:e62196. doi: 10.7554/eLife.62196 (PMC8175085; doi:10.7554/eLife.62196)
Supplement: Figure 4—figure supplement 1—source data 1. [file elife-62196-fig4-figsupp1-data1.xlsx]

## Sheet: Sheet1
Figure 4-figure supplement 1-source data 1					Figure 4-figure supplement 1N
						Control	Ablated ISV	Adjacent ISV
					Larva 1	0.921506	0.583272	0.861246
						0.951929	0.41755	0.694737
						1.00163	0.763189	0.802886
					Larva2	0.907539	0.481396	1.10022
						0.874052	0.401039	1.20575
						0.816055	0.534187	1.20234
					Larva 3	1.05324	0.454227	0.693791
						1.33065	0.34769	0.765324
						1.0111	0.726928	0.701491
					Larva 4	0.864386	0.349281	0.859804
						0.68655	0.430005	1.00646
						0.825914	0.583787	0.8779
					Larva 5	0.972046	0.506042	0.667627
						0.897628	0.608767	0.764896
						1.02748	0.730712	0.886563
					Larva 6	0.8502	0.610471	0.848683
						0.934999	0.563994	0.685505
						0.769355	0.84583	0.7965
					Larva 7	0.83641	0.626836	0.852082
						0.997611	0.637405	0.730138
						1.08507	0.680916	0.833922
					Larva 8	0.869024	0.522656	0.841123
						0.996714	0.484709	0.978858
						0.828605	0.550209	0.864119
					Larva 9	0.997698	0.642778	0.838947
						1.2494	0.586117	0.796698
						0.953537	1.06739	1.03281
					Larva 10		0.514597	1.09538
							0.477529	1.09088
							0.847573	1.00544
					Larva 11		0.589782	0.951884
							0.592807	0.919903
							0.606213	0.984297
					Larva 12		0.59767	0.648469
							0.559768	0.785426
							0.570187	0.927447
					Larva 13		0.494345	0.916286
							0.875062	0.762222
							0.965234	0.739534
					Larva 14		0.471199	0.996038
							0.653191	0.897123
							0.572114	1.10023
