# Supplementary material for: Live-imaging of endothelial Erk activity reveals dynamic and sequential signalling events during regenerative angiogenesis
Source: eLife. 2021 May 18;10:e62196. doi: 10.7554/eLife.62196 (PMC8175085; doi:10.7554/eLife.62196)
Supplement: Figure 4—figure supplement 1—source data 2. [file elife-62196-fig4-figsupp1-data2.xlsx]

## Sheet: Sheet1
Figure 4-figure supplement 2-source data 1					Figure 4-figure supplement 2C
						15 mpa		3 hpa
						Control	Control Ablation	Control	Control Ablation
					Larva 1	1.21615	0.68281	1.5207	0.755426
						1.1304	0.603677	1.03622	0.833362
						1.03536	0.7406	1.16356	1.04167
					Larva 2	0.826539	0.374654	1.00979	0.863778
						0.89317	0.617729	0.981216	0.779725
						1.11946	0.583511	0.967347	0.857021
					Larva 3	0.936015	0.435096	0.88256	1.03319
						1.05602	0.521891	0.782619	1.15498
						0.836205	0.777646	0.86322	1.05385
					Larva 4	1.01735	0.407399	0.685813	0.874213
						1.12502	0.470645	0.772067	0.915422
						0.84754	0.576716	0.699444	0.786322
					Larva 5	1.12485	0.769663	1.07648	0.600711
						1.09133	0.915871	1.38059	1.00585
						1.01963	0.563939	1.45497	0.839518
					Larva 6	0.786702	0.360936	1.19079	0.474695
						0.922097	0.569254	1.20892	0.710204
						1.19293	0.438989	0.998487	0.727045
					Larva 7	1.0763	0.804508		1.10787
						0.969352	0.732233		1.15643
						1.06458	0.790823		0.915387
					Larva 8	0.994626	0.842908		0.520504
						1.09502	0.720441		0.99857
						0.786882	0.841475		0.987893
					Larva 9	0.796048	0.715567
						0.943462	0.587023
						1.04544	0.61315
					Larva 10	1.0566	0.516111
						0.979752	0.663121
						0.949471	0.431039
					Larva 11	1.03511	0.689993
						0.739453	0.592238
						1.07111	0.838699
					Larva 12	0.959543	0.43874
						0.956357	0.619301
						0.968562	0.458397
					Larva 13	0.835261	0.500632
						0.845255	0.526422
						0.939406	0.625902
					Larva 14		0.525806
							0.540436
							0.741773
					Larva 15		0.48731
							0.711092
							0.689171
					Larva 16		0.438842
							0.559241
							0.668015
