# Supplementary material for: Live-imaging of endothelial Erk activity reveals dynamic and sequential signalling events during regenerative angiogenesis
Source: eLife. 2021 May 18;10:e62196. doi: 10.7554/eLife.62196 (PMC8175085; doi:10.7554/eLife.62196)
Supplement: Figure 4—source data 1. [file elife-62196-fig4-data1.xlsx]

## Sheet: Sheet1
Figure 4-source data 1				Figure 4C and D		Ablated ISV
						Larva 1						Larva 2						Larva 3						Larva 4						Larva 5						Larva 6						Larva 7						Larva 8
					Time	1st EC from wound		2nd EC from wound		3rd EC from wound		1st EC from wound		2nd EC from wound		3rd EC from wound		1st EC from wound		2nd EC from wound		3rd EC from wound		1st EC from wound		2nd EC from wound		3rd EC from wound		1st EC from wound		2nd EC from wound		3rd EC from wound		1st EC from wound		2nd EC from wound		3rd EC from wound		1st EC from wound		2nd EC from wound		3rd EC from wound		1st EC from wound
					Pre-ablation	1		1		1		1		1		1		1		1		1		1		1		1		1		1		1		1		1		1		1		1		1		1
					15 mpa	0.432124		0.630125		0.616841		0.742374		0.671184		0.616481		0.722851		0.731339		0.664997		0.685478		0.674554		0.858777		0.545723		0.577571		0.642014		0.781309		0.816856		0.994899		0.638724		0.635757		0.813798		0.576222
					30 mpa	0.577451		0.65344		0.738341		0.642104		0.670541		0.608239		0.727357		0.765419		0.642525		0.699758		0.700144		0.855672		0.453479		0.571751		0.628399		0.760711		0.622784		0.921702		0.613309		0.696831		0.761466		0.522718
					45 mpa	0.522487		0.655502		1.03322		0.636004		0.580157		0.665606		0.868163		0.759206		0.653691		0.704277		0.697295		0.903844		0.417251		0.714759		1.0073		0.650264		0.55461		0.801614		0.657048		0.943475		0.899555		0.579052
					1 hpa	0.421727		0.652336		0.822067		0.544238		0.743283		0.893451		0.853705		0.743324		0.733441		0.704372		0.677596		0.988421		0.429649		0.716479		0.912938		0.639687		0.530079		0.877715		0.648005		1.01432		0.942914		0.546674
					1.5 hpa	0.343015		0.630305		0.639284		0.598163		0.513059		0.721861		0.904471		0.765416		0.825339		0.692434		0.703843		0.810795		0.406642		0.619933		0.697448		0.58096		0.510423		0.993596		0.52519		0.815282		1.05655		0.54044
					2 hpa	0.539988		0.558863		0.642461		0.492588		0.50159		0.625244		0.904828		0.727208		0.714628		0.719374		0.669661		0.776266		0.391594		0.540602		0.65195		0.503188		0.560356		0.978559		0.51908		0.976379		0.902878		0.472707
					2.5 hpa	0.533537		0.526892		0.614592		0.428801		0.511133		0.614806		0.887794		0.734632		0.661968		0.675163		0.641077		0.79565		0.423595		0.52778		0.669904		0.409098		0.556659		0.981441		0.437797		0.771432		0.973633		0.486531
					3 hpa	0.639382		0.566625		0.554104		0.4263		0.514326		0.538764		0.796218		0.651198		0.866422		0.698402		0.588683		0.718246		0.390434		0.65636		0.831095		0.477401		0.475894		1.02462		0.451148		0.668821		0.94527		0.495099
[truncated: 62 more columns]
