# Supplementary material for: Live-imaging of endothelial Erk activity reveals dynamic and sequential signalling events during regenerative angiogenesis
Source: eLife. 2021 May 18;10:e62196. doi: 10.7554/eLife.62196 (PMC8175085; doi:10.7554/eLife.62196)
Supplement: Figure 5—source data 1. [file elife-62196-fig5-data1.xlsx]

## Sheet: Sheet1
Figure 5-source data 1				Figure 5A	DMSO		SL327	4 uM SU5416	10 uM SU5416			Figure 5B	Control		Ablated ISV EC				Figure 5C							Figure 5D	Control		Ablated ISV EC				Figure 5H	DMSO						DMSO						4 uM SU5416
					control	Ablated ISV	Ablated ISV	Ablated ISV	Ablated ISV				Uninjected control	kdrl crispant	Uninjected control	kdrl crispant				DMSO	SU5416	SL327	Tramatenib				Uninjected control	spi1/csf3r morphants	Uninjected control	spi1/csf3r morphants				Control						Ablated ISV						Ablated ISV
				Larva 1	1.00016	0.6157	0.905696	0.956072	0.679665			Larva 1	0.972	1.11	0.759	0.666			Larva 1	100	70.3226	79.3548	78.7097			Embryo 1	1.09	0.796	0.64	0.568				1st EC from wound		2nd EC from wound		3rd EC from wound		1st EC from wound		2nd EC from wound		3rd EC from wound		1st EC from wound		2nd EC from wound
					1.10886	0.543623	0.84508	0.670817	0.596334				1.16	1.3	0.82	0.845			Larva 2	100	67.7419	78.0645	71.6129				1.02	1	0.669	1.07			Larva 1	1.00016		1.10886		0.947562		0.6157		0.543623		0.670077		0.956072		0.670817
					0.947562	0.670077	0.92041	0.720771	1.0504				1.26	1.06	0.629	0.933			Larva 3	100	65.0323	60.6452	90.9677				1.05	1.18	0.936				Larva 2	1.11446		1.23542		1.23312		0.438757		0.973167		0.582525		0.328994		0.913904
				Larva 2	1.11446	0.438757	1.00067	0.328994	0.812065			Larva 2	1.06	0.994	0.752	1.06			Larva 4	100	77.0701	67.0968	73.5484			Embryo 2	0.87	0.99	0.469	0.688			Larva 3	0.888669		0.877591		0.859155		0.640172		0.723891		0.881382		0.800361		0.912838
					1.23542	0.973167	0.970997	0.913904	0.9197				1.07	1.39	0.763	0.999			Larva 5	100	66.0131	96.7742	64.9682				0.726	0.926	0.757	0.954			Larva 4	0.917308		1.00631		1.15011		0.437368		0.425222		0.469297		0.676118		1.02118
					1.23312	0.582525	1.58259	0.81	0.963375				1.16	0.802	0.755	1.2			Larva 6	100	80.8383	70.3226	72.6708				0.615	0.8	0.747				Larva 5	1.07123		0.987791		0.924875		0.756182		0.711901		0.815539		0.713059		0.776486
				Larva 3	0.888669	0.640172	0.551416	0.800361	0.735189			Larva 3	0.829	1.3	0.361	0.469			Larva 7	100	86.7021	100	64.557			Embryo 3	0.916	1.02	0.696	0.464			Larva 6	0.920023		1.35058		1.23971		0.463693		0.574613		0.432623		0.942999		1.02839
					0.877591	0.723891	0.781553	0.912838	1.17562				0.721	1.04	0.836	0.538			Larva 8	100	71.0843	100	63.2911				0.967	0.95	0.829	0.549			Larva 7	1.21209		1.09541		1.12342		0.62148		0.684048		0.782725		0.934051		0.819002
					0.859155	0.881382	1.28421	0.615074	1.10164				1.15		0.703	0.814			Larva 9	100	100	70.1987	70.7317				1.1	0.883	1.07	0.945			Larva 8	1.31156		0.748005		0.926954		0.65172		0.665662		0.781883		0.614992		0.567102
				Larva 4	0.917308	0.437368	0.805778	0.676118	0.766499			Larva 4	0.717	1.37	0.815	0.636			Larva 10	100	81.5789	75.4601	91.9753			Embryo 4	0.867	0.984	0.761	0.598			Larva 9	1.20267		1.11672		0.993481		0.533593		0.54025		0.586196		0.47247		0.55758
					1.00631	0.425222	0.809217	1.02118	0.53191				0.945	1.26	0.521				Larva 11	84.7134	76.7296	100	74.1722				0.804	1.06	0.761	0.649			Larva 10	1.11251		0.894524		0.980637		0.687216		1.03402		1.05624		0.408128		0.80022
					1.15011	0.469297	1.14276		1.46919				0.985	0.932	0.443				Larva 12	100	66.4516	66.6667	80.1325				0.926	0.973	0.503	0.663			Larva 11	0.87355		1.0608		0.744987		0.779833		0.672217		0.764639		0.569322		0.53998
				Larva 5	1.07123	0.756182	1.16308	0.713059	0.714761			Larva 5	1.28	0.979	0.326	1.09			Larva 13	100		82.1192	68.1529			Embryo 5	0.884	0.828	0.442	0.706			Larva 12							0.540645		0.543582		0.746055		0.408998		0.437279
					0.987791	0.711901	1.10256	0.776486	1.03819				0.879	1.72	0.573	0.864			Larva 14	73.2919		84.7134					0.957	1.08	0.929	0.814			Larva 13							0.382896		0.581672		0.692208		0.422165		1.22387
					0.924875	0.815539	0.97346	0.918027					0.846	0.978	0.709				Larva 15	100		100					1.09	0.945		1.12			Larva 14							0.644133		0.464633		0.438999		0.544619		0.764407
				Larva 6	0.920023	0.463693	0.795766	0.942999	1.47368			Larva 6	0.684	1.24	0.66	0.769			Larva 16	100						Embryo 6	0.85	1.15	0.617	0.689			Larva 15							0.694985		0.433412		0.821087		0.30975		0.779827
					1.35058	0.574613	0.775619	1.02839	1.04149				1.31	0.722	0.592	0.641			Larva 17	100							0.922	1.06	0.73	0.738			Larva 16							0.659986		1.1997		0.503454		0.713151		0.580292
					1.23971	0.432623	0.957801	1.16623	1.04692				0.84	1.21	0.684	0.745			Larva 18	100							0.986	1.15	1.05	0.675			Larva 17							0.478701		0.645641		1.01609
				Larva 7	1.21209	0.62148	0.819395	0.934051	0.815931			Larva 7	0.808	0.96	0.613	1.68										Embryo 7	0.619	0.905	0.321	0.689
					1.09541	0.684048	0.922726	0.819002	0.70117				0.791	0.991	0.888	1.58											0.928	0.885	0.51	0.586
					1.12342	0.782725	1.00108	0.858305	1.08139				0.753	1.07		1.07											0.768	1.08	0.758	1.04
				Larva 8	1.31156	0.65172	0.60585	0.614992	0.970419			Larva 8	0.867	0.812	0.709	0.95										Embryo 8	1		0.291	0.391
					0.748005	0.665662	0.707407	0.567102	0.846101				0.69	0.579	0.58												1.09		0.669	0.509
					0.926954	0.781883	1.01417	0.848439	0.991634				1.07	0.944													0.949		1.04	0.763
				Larva 9	1.20267	0.533593	0.734393	0.47247	0.910187			Larva 9	0.911	1.29		0.818										Embryo 9			0.609	0.493
					1.11672	0.54025	0.817677	0.55758	1.09062				1.05	1.02		0.919													0.534	0.792
					0.993481	0.586196	0.93534	0.909141	1.14774				0.959			0.794													0.839	0.906
				Larva 10	1.11251	0.687216	0.735884	0.408128	0.948786			Larva 10		1.07		0.342										Embryo 10			0.625	0.518
					0.894524	1.03402	0.891513	0.80022	1.0813					1.01		0.46													0.68	0.428
					0.980637	1.05624	0.950558	1.07877	1.1					0.799		0.678													0.609	0.574
				Larva 11	0.87355	0.779833	0.622585	0.569322	0.80188																	Embryo 11				0.58
					1.0608	0.672217	0.87226	0.53998	1.05087																					0.666
					0.744987	0.764639	0.96179	0.997704	1.18129																					0.993
				Larva 12		0.540645	0.634927	0.408998
						0.543582	1.15601	0.437279
						0.746055	1.00478	0.949626
				Larva 13		0.382896	0.962891	0.422165
						0.581672	0.988311	1.22387
						0.692208	1.05747	1.15182
				Larva 14		0.644133	0.562097	0.544619
						0.464633	0.746997	0.764407
						0.438999	0.901488	0.943391
				Larva 15		0.694985		0.30975
						0.433412		0.779827
						0.821087		0.900277
				Larva 16		0.659986		0.713151
						1.1997		0.580292
						0.503454		0.744789
				Larva 17		0.478701
						0.645641
						1.01609
[truncated: 10 more columns]
