# Supplementary material for: Live-imaging of endothelial Erk activity reveals dynamic and sequential signalling events during regenerative angiogenesis
Source: eLife. 2021 May 18;10:e62196. doi: 10.7554/eLife.62196 (PMC8175085; doi:10.7554/eLife.62196)
Supplement: Figure 6—source data 1. [file elife-62196-fig6-data1.xlsx]

## Sheet: Sheet1
Figure 6-source data 1				Figure 6B																																				Figure 6C	DMSO			Nifedipine				Figure 6D	DMSO
						Ablated ISV											Adjacent ISV											Control													control	Ablated ISV	Adjacent ISV	Ablated ISV	Adjacent ISV				Control
					Minutes post-ablation	Larva 1	Larva2	Larva 3	Larva 4	Larva 5	Larva 6	Larva 7	Larva 8	Larva 9	Larva 10		Larva 1	Larva 2	Larva 3	Larva 4	Larva 5	Larva 6	Larva 7	Larva 8	Larva 9	Larva 10		Larva 1	Larva 2	Larva 3	Larva 4									Larva 1	0.862808	0.609394	0.569808	0.669605	0.494657			Larva 1	0.992846
					5	2.72512	2.6621	2.22747	1.82052	2.4237	1.84483	1.28707	1.9404	2.86597	3.11995		1.41281	1.06122	1.10131	0.72996	1.27204	0.814795	0.839825	0.919241	0.850197	1.17631		1.02787	1.00022	1.11941	1.02095										1.09824	0.835349	0.710499	0.632689	0.662632				0.887803
					6	3.12023	2.26648	1.90461	1.6392	2.54601	1.69154	1.13835	1.99054	2.67399	2.56359		1.37347	1.05701	1.07828	0.732512	1.26897	0.82699	0.845516	1.0177	0.937061	1.13907		1.03338	1.00822	1.08524	1.01767										1.07687	0.759121	0.975924	0.802299	0.781539				1.11318
					7	2.89458	1.88068	1.8049	1.43973	2.19582	1.56071	0.974502	1.86907	2.27276	2.34275		1.37746	1.09592	1.03869	0.731312	1.26181	0.838795	0.78336	0.984363	0.948695	1.18359		1.0065	0.976988	1.10219	0.992147									Larva 2	0.959692	0.671485	0.669644	0.978037	0.601914			Larva 2	0.81401
					8	2.56432	1.61742	1.72765	1.06159	1.97177	1.46546	0.779777	1.78762	2.01245	2.11165		1.36186	1.08264	1.10497	0.721091	1.3233	0.794331	0.765802	1.09935	0.910481	1.11719		1.01783	0.987447	1.08301	1.00044										0.995056	0.633404	0.435196	0.670275	0.653182				0.854896
					9	2.40419	1.43257	1.67967	0.950847	1.54995	1.45157	0.764249	1.75013	1.93106	2.03218		1.37663	1.1317	1.18794	0.711789	1.34918	0.794124	0.731328	1.22478	0.879953	1.1605		1.0323	0.981045	1.09792	1.02969										0.898526	0.727133	0.409224	0.843306	1.26482				0.892746
					10	2.19636	1.3189	1.66273	0.926106	1.61309	1.4247	0.743294	1.758	1.70065	1.38199		1.4113	1.10708	1.17823	0.719471	1.31901	0.7868	0.711027	1.20215	0.86573	1.09978		0.998065	0.967895	1.07717	1.03465									Larva 3	1.08608	0.39186	0.538852	0.639512	0.649641			Larva 3	1.00496
					11	2.10331	1.33755	1.5911	0.910918	1.71825	1.40542	0.748256	1.79368	1.20126	1.26994		1.46623	1.15325	1.17908	0.748193	1.31001	0.785924	0.714557	1.33271	0.836847	1.15025		1.03617	0.963478	1.04958	1.01555										0.965432	0.564838	0.349675	0.52295	0.792824				0.888752
					12	1.99602	1.34911	1.55594	0.936118	1.72175	1.37907	0.733171	1.78076	1.11498	1.06983		1.47754	1.16749	1.17091	0.741199	1.2989	0.770191	0.697109	1.43492	0.896396	1.20965		0.992852	0.961252	1.03617	1.00416										0.644417	0.460345	0.458327	0.563201	0.860274				0.959219
					13	1.91082	1.49683	1.49163	0.920761	1.67534	1.3838	0.718889	1.72934	0.883218	0.87038		1.51128	1.17742	1.14438	0.719625	1.30517	0.783654	0.682231	1.41662	0.88729	1.14463		1.01603	0.966889	1.07422	0.986174									Larva 4	0.972008	0.723121	0.525528	0.83068	0.627214			Larva 4	1.07158
					14	1.76024	1.38623	1.48656	0.933761	1.54476	1.39447	0.7318	1.78374	0.885107	0.872061		1.51009	1.19322	1.11654	0.738474	1.33569	0.777982	0.688096	1.55883	0.869112	1.15352		1.00624	0.959651	1.0751	1.0152										0.99059	0.489081	0.688982	0.715849	0.602699				0.863941
					15	1.62447	1.38621	1.4909	0.91416	1.37832	1.36061	0.726661	1.7749	0.86359	0.840351		1.49022	1.19928	1.17019	0.722843	1.30997	0.779636	0.69459	1.58031	0.879309	1.10724		1.02437	0.965216	1.10576	0.977965										0.92226	0.803598	0.816988	0.868709	0.614923				0.915487
					16	1.55126	1.41423	1.4516	0.913771	1.32098	1.26067	0.729273	1.78584	0.871015	0.78919		1.51629	1.20882	1.15259	0.733928	1.29975	0.766096	0.694104	1.57187	0.870758	1.04288		1.0179	0.962581	1.07475	0.999781									Larva 5	1.02646	0.67101	0.626717	0.773242	0.7785			Larva 5	0.811393
					17	1.5178	1.45795	1.4641	0.895978	1.33829	1.2056	0.728262	1.82924	0.874337	0.7571		1.5071	1.24576	1.19375	0.729452	1.30451	0.7674	0.686826	1.59893	0.853673	0.955638		1.0138	0.971271	1.05618	1.01082										0.941431	0.60005	0.464233	0.771006	0.501082				0.920041
					18	1.41148	1.42757	1.45828	0.906982	1.30548	1.16691	0.707829	1.78115	0.831278	0.833075		1.44414	1.20576	1.10578	0.737436	1.29159	0.767295	0.667427	1.631	0.879972	1.10506		1.0048	0.965913	1.07179	1.0058										1.01135	0.906273	0.678675	0.934883	0.696246				0.98651
					19	1.40837	1.43974	1.4705	0.894749	1.32959	1.17778	0.710251	1.74164	0.822838	0.891862		1.46469	1.19796	1.14308	0.724998	1.31573	0.78593	0.698591	1.58428	0.862678	1.21795		1.0292	0.971149	1.06839	1.00149									Larva 6	0.8731	0.754642	0.491037	0.872424	0.747684			Larva 6	1.02298
					20	1.37422	1.47483	1.47205	0.909518	1.31493	1.16852	0.737169	1.72296	0.912791	0.823463		1.45971	1.22303	1.13721	0.734569	1.31854	0.765649	0.713406	1.51031	0.854651	1.08955		1.05807	0.98399	1.03372	1.01909										1.0528	0.788591	0.589447	0.902664	0.899084				1.00464
																																									0.876666	0.735654	0.5498	0.848973	0.983462				0.966901
																																								Larva 7	1.08683	0.624319	0.573532	0.544194	0.422316			Larva 7
																																									0.911896	0.583554	0.718718	0.554031	0.643562
																																									0.990288	0.664247	0.567226	0.868804	0.624716
																																								Larva 8	0.840653	0.630786	0.803732	0.947546	0.76632			Larva 8
																																									0.806026	0.572616	0.701908	0.939591	0.820537
																																									0.834139	0.631333	0.762929	0.903075	0.93587
																																								Larva 9	0.838879	0.587135	0.831402	0.516026	0.8144			Larva 9
																																									0.773739	0.507103	0.731181	1.31883	0.491083
																																									0.698446	0.685738	0.569057	1.05567	0.901733
																																								Larva 10	0.917854	0.60757	0.722865	0.802403	0.553597			Larva 10
																																									1.05509	0.641089	0.823499	0.854127	0.604831
																																									0.912095	0.806537	0.682307	0.851502	0.806356
																																								Larva 11	0.907371	0.739364	0.610752	0.707528	0.758497			Larva 11
																																									0.821285	0.53049	0.657973	0.809933	0.762277
																																									0.92216	0.463112	0.835267	0.870225	0.602278
																																								Larva 12	0.998651	0.63614	0.633283	0.678043	0.446882
																																									1.27623	0.836682	0.707948	0.654428	0.387959
																																									1.05225	0.642655	0.619057	0.827437	0.756336
																																								Larva 13	0.817938	0.727842	0.875376
																																									0.94156	0.812025	0.703393
																																									0.882208	0.798585	0.816769
[truncated: 77 more columns]
